1 **Genome-wide scans of selection highlight the impact of biotic and abiotic**  
2 **constraints in natural populations of the model grass *Brachypodium distachyon*.**

3

4

5 Yann Bourgeois<sup>1</sup>, Christoph Stritt<sup>2</sup>, Jean-Claude Walser<sup>3</sup>, Sean P. Gordon<sup>4</sup>, John P.  
6 Vogel<sup>4</sup>, Anne C. Roulin<sup>2\*</sup>

7

8

9

10 <sup>1</sup> New York University Abu Dhabi, PO Box 129188, Saadiyat Island, Abu Dhabi,  
11 United Arab Emirates

12 <sup>2</sup> Institute of Plant and Microbial Biology, University of Zürich, Zollikerstrasse 107,  
13 8008 Zürich, Switzerland

14 <sup>3</sup> Genetic Diversity Centre, ETH Zürich, Universitätstrasse 16, Zurich, Switzerland

15 <sup>4</sup>DOE Joint Genome Institute, Walnut Creek, CA 94598, USA.

16

17 \* Corresponding author: [anne.roulin@botinst.uzh.ch](mailto:anne.roulin@botinst.uzh.ch)

18

19 Key words: local adaptation, genome scans of selection, grasses, *Brachypodium*  
20 *distachyon*, host-pathogen interaction.

21

## 22 **Summary**

23 Grasses are essential plants for ecosystem functioning. Thus, quantifying the selection  
24 pressures that act on natural variation in grass species is essential regarding  
25 biodiversity maintenance. In this study, we investigated the selection pressures that  
26 act on natural populations of the grass model *Brachypodium distachyon* without prior  
27 knowledge about the traits under selection. To do so, we took advantage of whole-  
28 genome sequencing data produced for two natural populations of *B. distachyon* and  
29 used complementary genome-wide scans of selection (GWSS) methods to detect  
30 genomic regions under balancing and positive selection. We show that selection is  
31 shaping genetic diversity at multiple temporal and spatial scales in this species and  
32 affects different genomic regions across the two populations. Gene Ontology  
33 annotation of candidate genes reveals that pathogens may constitute important factors  
34 of selection in *Brachypodium distachyon*. We eventually cross-validated our results  
35 with QTL data available for leaf-rust resistance in this species and demonstrated that,  
36 when paired with classical trait mapping, GWSS can help pinpointing candidate genes  
37 for further molecular validation. Our study revealed widespread signatures of natural  
38 selection on genes involved in adaptation in *B. distachyon* and suggests that  
39 pathogens may constitute an important driving force of genetic diversity and  
40 evolution in this system. Thanks to a near-base perfect reference genome and the  
41 large collection of freely available natural accessions collected across its natural  
42 range, *B. distachyon* appears as a prime system for studies in ecology, population  
43 genomics and evolutionary biology.

44

45

## 46 **Introduction**

47 Grasses cover more than 40% of the world land area (Gibson, 2009) and dominate a  
48 wide variety of ecosystems, from tropical to temperate regions (Clayton, 1981;  
49 Gibson, 2009). Grasses also play a key role in eco- and agrosystem functioning as  
50 they provide habitats for many animal species (Groves, 2000) and represent the main  
51 source of grain and forage (Stromberg, 2011). Increasing crop production to meet the  
52 food and energy requirements of the world's growing population is however putting  
53 great pressure on natural grasslands (Wallace, 1997; Helm *et al.*, 2009; Ceballos *et*  
54 *al.*, 2010). Faced with constant deterioration and fragmentation due to anthropic  
55 activities (Kiviniemi, 2002), these ecosystems are highly endangered (Ceballos *et al.*,  
56 2010), but little is known about their evolutionary resilience. Assessing the genetic  
57 basis of adaptation and quantifying the selection pressures that act on natural variation  
58 in grass species is therefore crucial with respect to biodiversity maintenance and food  
59 security.

60 To date, reciprocal transplant experiments have been extensively used to test the  
61 effect of selection on adaptive differentiation across populations (for review see  
62 Savolainen *et al.*, 2013). Based on a “home vs. foreign” effect on fitness, reciprocal  
63 transplants are indeed powerful to unravel overall genotype by environment (GxE)  
64 interactions and demonstrated the prevalence of local adaptation in grasses and plants  
65 in general (for review see Bischoff *et al.*, 2006; Wadgyman *et al.*, 2017). However,  
66 reciprocal transplant experiments use proxy such as survival, vegetative growth or  
67 seed production to measure the effect of the habitat on fitness (Bischoff *et al.*, 2006).  
68 Hence, they provide little information about the functional and genetic bases of  
69 adaptation, unless combined with trait mapping such as quantitative trait locus (QTL)  
70 analyses and genome-wide association studies (GWAS) (Latta, 2009). QTL analyses  
71 and GWAS, on the other hand, are largely constrained by the effort and time  
72 necessary for high-resolution mapping. In grasses, while these trait-by-trait  
73 approaches have been valuable to decipher the genetic architecture of important  
74 characters with regard to crop genetic improvement (Huang *et al.*, 2002; Barbieri *et*  
75 *al.*, 2012; Morris *et al.*, 2013; Slavov *et al.*, 2014), they remain of limited value to  
76 grasp the overall selective forces that act on natural populations.

77 An efficient alternative to provide insights about evolutionary forces in natural  
78 populations consists in identifying genes under various types of selection at a whole

79 genome scale, then describing their function and the type of selection acting on them  
80 (Mitchell-olds *et al.*, 2007). For instance, new mutations that are beneficial in some  
81 populations will be positively selected and are more likely to quickly increase in  
82 frequency. Such so-called selective sweeps tend to reduce genetic diversity, increase  
83 differentiation among populations, and lead to extended haplotypes in the vicinity of  
84 the locus under selection due to genetic hitchhiking (Nielsen, 2005; Hermisson,  
85 2009). Various genome-wide selection scans (GWSS) methods have been developed  
86 to detect such footprints of positive selection in genomes while taking into account  
87 demographic history (Tang *et al.*, 2007; Gautier *et al.*, 2012; Stamatakis *et al.*, 2013;  
88 Messer, 2015), and thanks to the remarkable progress of sequencing technologies,  
89 GWSS are now emerging as complementary approaches to classical trait mapping.

90 While local adaptation is commonly associated to positive selection on new  
91 advantageous polymorphisms, recent studies have demonstrated that balancing  
92 selection is also playing an important role in this evolutionary process (Mitchell-Olds  
93 *et al.*, 2007; Rasmussen *et al.*, 2014; Wu *et al.*, 2017). The term balancing selection is  
94 an “umbrella” concept (Fijarczyk & Babik, 2015) which describes the maintenance of  
95 genetic diversity over longer periods of time through adaptation to spatial  
96 heterogeneity, heterozygote advantage and negative frequency-dependent selection  
97 (Mitchell-Olds *et al.*, 2007; Rasmussen *et al.*, 2014). Leading to the recycling of  
98 polymorphisms and to selection on standing variation (Richman, 2000; Turchin *et al.*,  
99 2012), this process is more difficult to detect than positive selection (Fijarczyk &  
100 Babik, 2015) since older alleles had more time to recombine and may lead to narrow  
101 signatures around selected sites. As a consequence, the effect of balancing selection is  
102 still largely overlooked in genome scans, which remain strongly biased towards the  
103 detection of recent positive selection (Hassl & Payseur, 2016).

104 In this study, we capitalize on the near base-perfect quality of the reference genome of  
105 the Mediterranean grass *Brachypodium distachyon* (<https://phytozome.jgi.doe.gov>) to  
106 investigate how both positive and balancing selection are shaping diversity in this  
107 species. In the last decade, *B. distachyon* has been developed as a powerful model for  
108 research on temperate grass species as it is closely related to major crop cereals and to  
109 some of the grasses used for biofuel production (The international brachypodium  
110 Consortium, 2010). Entirely sequenced, its small diploid genome (272Mb) is fully  
111 assembled into five chromosomes and has been exhaustively annotated (The

112 international brachypodium Consortium, 2010). In addition, *B. distachyon* is broadly  
113 distributed around the Mediterranean rime (Dell'Acqua *et al.*, 2014; Gordon *et al.*,  
114 2014; Tyler *et al.*, 2016), providing access to natural populations from contrasting  
115 habitats for which a large collection has been collected. It constitutes therefore a  
116 unique and prime system to investigate the genetic basis of local adaptation in natural  
117 grass populations, opening the way to further fundamental and applied research.

118 Here, we took advantage of whole-genome sequencing data produced for 44  
119 *B. distachyon* natural accessions originating mainly from Spain and Turkey (Gordon  
120 *et al.*, 2017). We identified over 6 million SNPs and used four complementary GWSS  
121 methods to detect genomic regions under different regimes of selection (Figure 1).  
122 Namely, we asked i) at what time and geographical scale is selection acting in  
123 *B. distachyon* populations? ii) what are the selective constrains that shape diversity  
124 and adaptation in these populations? iii) whether positive selection is acting on the  
125 same genomic regions in the two populations or, on the opposite, on distinct loci?

126

127

## 128 **Results**

### 129 *Population structure*

130 In this study, we used whole-genome sequencing data (paired-end; Illumina  
131 technology) with a 86-fold median coverage of 44 *B. distachyon* accessions  
132 originating from Turkey, Iraq, Spain and France (Figure 2A, Table S1, (Gordon *et al.*,  
133 2017). After filtering, we identified 6,204,029 SNPs. An ADMIXTURE analysis,  
134 where K=2 was identified as the best model, highlighted two distinct genetic clusters,  
135 an eastern and a western one, with extremely little admixture between the two (Figure  
136 2B). For the rest of the study, accessions from Turkey and Iraq will be referred to as  
137 the eastern population while accessions from Spain and France will be referred to as  
138 the western population. The western population showed a lower level of nucleotide  
139 diversity (Wilcoxon test; P-value < 2.2e-16, Figure 2C) and haplotype diversity (P-  
140 value < 2.2e-16, data not shown) than the eastern one. Excluding the reference  
141 accession Bd21, which has been artificially inbred before sequencing, the average  
142 level of heterozygosity in these accession is of 8% and ranges from 4 to 17.4% (Table  
143 S1).

144 *Functional clustering of the genome of B. distachyon*

145 GWSS outputs provide information about the likelihood for a given locus to be under  
146 selection. A classical approach applied to analyze the results of GWSS consists in  
147 selecting genomic regions containing top 1% outliers for signals of selection and then  
148 assessing whether some biological functions or processes are significantly over-  
149 represented in the gene sets under selection through a Gene Ontology (GO)  
150 annotation (Kelley *et al.*, 2006; Hancock *et al.*, 2011; Nelson *et al.*, 2017). While  
151 recombination rate is relatively high in *B. distachyon* (Huo *et al.*, 2011), signals of  
152 selection around focal loci may decrease slowly due to locally stronger linkage  
153 disequilibrium and subsequent genetic hitchhiking. 1% outlier regions may thus  
154 contain several adjacent genes. Because genes having the same function or being  
155 involved in the same biological process tend to be physically clustered (Hammond-  
156 kosack & Jones, 1996; Michelmore & Meyers, 1998; Takos *et al.*, 2011; Nutzmann &  
157 Osbourn, 2014; Singh *et al.*, 2015), we anticipated that this non-random organization  
158 of genomes could lead to an over-representation of some biological pathways or  
159 functions in small genomic regions and to an artificial enrichment for some GO terms  
160 in GWSS 1% outlier regions (Pavlidis *et al.*, 2012).

161 To assess whether the genome of *B. distachyon* harbors such functional clusters of  
162 genes, we first performed a GO annotation for the 32,712 genes annotated in the  
163 reference genome. We then controlled for potential gene clustering by following the  
164 procedure described in (Al-Shahrour *et al.*, 2010). Briefly, we split the genome into  
165 overlapping windows of 50 consecutive genes and performed enrichment analyses on  
166 each window. We identified 272 windows significantly enriched for at least one  
167 biological process (Table S2). Several windows were enriched for processes that may  
168 be associated to adaptation to local environmental conditions such response to stress  
169 and defense response (Table S2). This prompted us to narrow down top 1% outlier  
170 regions by keeping only the genes located at and in the immediate vicinity (-10% of  
171 the peak value) of each of the peaks of selection. With the exception of the  
172 coalescence analysis, which is a window-based approach (see methods), all analyses  
173 subsequent to GWSS reported in the following sections were performed on these  
174 filtered outputs.

175  
176

177 *Genes under balancing selection due to environmental heterogeneity*

178 Variation in abiotic conditions can drive local adaptation at a fine-grained spatial  
179 scale and lead to correlations between genotypes and environment. We first used an  
180 environmental association analysis approach to detect loci that may have been  
181 repeatedly selected by convergent climatic conditions across the two populations. If  
182 alleles at these loci have been recycled in front of environmental conditions common  
183 to Spain and Turkey, they should display a detectable signal of association at the scale  
184 encompassed by our study. Note that geographically varying selection is sometimes  
185 considered as being distinct from balancing selection. While it can also be referred to  
186 as local adaptation in the literature (Mitchell-olds *et al.*, 2007), we kept it here under  
187 the term of balancing selection.

188 To detect such loci and to highlight alleles shared between the two populations, we  
189 selected seven bioclimatic variables showing variation within both the eastern and  
190 western populations but little variation between them (Figure 2D). As all these  
191 variables were either associated to temperature or to precipitation and are likely to be  
192 correlated, we summarized them with a PCA. The first axis of the PCA explained  
193 62.6% of the variance but did not discriminate populations (Figure 2D) and was used  
194 to perform an environmental association analysis with all the SNPs identified across  
195 the 44 accessions. We identified 26 genomic regions associated with the first PCA  
196 axis. These regions harbored 71 genes (Figure 3A). No significant enrichment for any  
197 specific biological process was observed (Table 1).

198

199 *Genes harboring extremely long coalescence time*

200 Balancing selection can be detected with coalescence approaches, as ancient alleles  
201 are associated with older coalescence times (Charlesworth, 2006). To detect  
202 additional candidate regions for balancing selection in *B. distachyon*, we used the  
203 software ARGWeaver (Rasmussen *et al.*, 2014). Briefly, ARGWeaver models the  
204 coalescent process along chromosomes and across non-recombining blocks of  
205 sequences to address their evolutionary history. It allows recovering several statistics  
206 that describe local genealogies and recombination, such as times since the most recent  
207 common ancestor (TMRCA), which should be increased near ancient alleles such as  
208 those under ancient balancing selection. By doing so, we identified 72 regions  
209 harboring 115 genes under what will be referred to as long-term balancing selection in

210 the following. We observed a significant enrichment for genes involved in  
211 phosphorylation (Table 1).

212

### 213 *Genes under disruptive selection between western and eastern populations*

214 As new mutations providing a selective advantage rise in frequency through positive  
215 selection, neutral mutations that are physically close tend to remain strongly linked to  
216 them. Recent positive selection should therefore lead to a signature of long haplotypes  
217 near selected mutations. We used the Rsb test (Tang *et al.*, 2007) to detect such  
218 signatures of recently or almost completed selective sweeps. This test detects  
219 haplotypes that are positively selected in one population by estimating the length of  
220 haplotypes around each allele at a core SNP, then comparing these lengths between  
221 populations. In contrast to the two approaches presented above, the Rsb test should  
222 detect regions that are genetically differentiated across the two populations (Figure 1).  
223 We identified 312 regions harboring 824 genes and 319 regions harboring 1212 genes  
224 in the eastern and western populations respectively (Figure 3A). The selected regions  
225 contained more genes in the western than in the eastern population (Wilcoxon test, P-  
226 value=0.001; Figure 3B). We observed a significant enrichment in genes involved in  
227 response to stress, particularly for defense response and response to oxidative stress in  
228 the eastern population (Table 1, Table S3). The gene set associated to the process of  
229 defense response contained well-known types of resistance genes (R-genes), i.e genes  
230 with NBS-LRR domains (Table S3). Eventually, we observed a significant  
231 enrichment for genes involved in nitrogen transport in the western population (Table  
232 1, Table S3).

233

### 234 *Genes under ongoing selection within population*

235 In the case of an ongoing and partial selective sweep (Figure 1), not all individuals  
236 within the population will display haplotype extension in the region under selection,  
237 which can lead to more subtle patterns that are not detected by Rsb test. We used the  
238 program H-scan to detect such incomplete patterns and genes under ongoing positive  
239 selection. We identified 142 regions harboring 487 genes and 79 regions harboring  
240 463 genes in the eastern and western population respectively (Figure 3A). The gene  
241 set under selection in the eastern population was significantly enriched for genes  
242 involved in stress response, including the processes of defense response and response



243 to cadmium ion (Table 1). The gene set associated to the process of defense response  
244 also contained many R-genes (Table S3). The gene set under selection in the western  
245 population showed a significant enrichment for genes involved in pyruvate metabolic  
246 process (Table 1, Table S3). As in the previous Rsb analysis, the selected windows  
247 contained more genes in the western than in the eastern population (Wilcoxon test, P-  
248 value=0.003; Figure 3B).

249

250 *GWSS outliers display allele frequency spectra and coalescence patterns consistent*  
251 *with expectations*

252 To test whether candidate regions displayed an allele frequency spectrum consistent  
253 with the type of selection they were supposed to detect, we computed different  
254 statistics and compared candidate regions to the rest of the genome. We first  
255 computed Tajima's D (Tajima, 1989), which is a measure of genetic diversity  
256 influenced by both selection and demographic variation. Positive values are  
257 associated with balancing selection and bottlenecks, while negative values suggest  
258 recent expansion or positive/purifying selection. We then computed nucleotide  
259 diversity, genome-wide relative ( $F_{ST}$ ) and absolute ( $d_{XY}$ ) measures of population  
260 differentiation (Cruickshank & Hahn, 2014). Note that  $d_{XY}$  can be interpreted as  $F_{ST}$ ,  
261 but is correlated to the time to coalescence of alleles from all populations, making it  
262 independent of diversity within populations. In addition to TMRCA values, we finally  
263 extracted relative TMRCA halftime (RTH) values from the output of ARGWeaver.  
264 RHT captures coalescence events are skewed toward the recent past but is  
265 independent of the overall coalescence rate (Rasmussen *et al.*, 2014). Assuming  
266 similar selection strength acting on Rsb and H-scan outliers, RTH is thus expected to  
267 be smaller in regions under ongoing positive selection (H-scan) than in regions under  
268 disruptive selection where one allele already reached near-fixation in one of the two  
269 populations (Rsb).

270 Regions associated with bioclimatic variables or under long-term balancing selection  
271 displayed significantly higher Tajima's D than the genomic background (Wilcoxon  
272 test, all P-values <  $1.0 \cdot 10^{-10}$ , Figure 3C) except for associated loci in Spain for which  
273 Tajima's D values were only marginally higher than in the rest of the genome (P-  
274 value=0.055). These regions also display a significantly higher level of nucleotide  
275 diversity within regional groups (P-values <  $1.0 \cdot 10^{-10}$ ) than the rest of the genome.

276 Coalescence times (TMRCA) within regional groups were higher for windows  
277 covering loci associated to environmental variables than for genomic background (P-  
278 values= $1.10^{-14}$  and 0.02 for eastern and western populations respectively). As  
279 expected, regions under long-term balancing selection also displayed higher  
280 TMRCA as they were specifically selected as belonging to the top 1% outlier for this  
281 statistic. Tajima's D, nucleotide diversity and TMRCA statistics are thus consistent  
282 with our expectations and confirmed that both the environmental association and  
283 coalescence analyses detected older polymorphisms shared across the two  
284 populations.

285 On the other hand, regions identified with the H-scan and Rsb approaches harbored  
286 negative and significantly lower Tajima's D than the rest of the genome, which is  
287 consistent under positive selection (all P-values  $< 1.10^{-5}$ , Figure 3C). Outlier windows  
288 for Rsb also displayed higher relative ( $F_{ST}$ , P-values  $< 2.2.10^{-16}$ ) and absolute levels of  
289 differentiation ( $d_{XY}$ ; P-values  $< 2.2.10^{-16}$ ) than the rest of the genome. These latter  
290 patterns are coherent with the high frequencies of divergent haplotypes between the  
291 western and eastern population for Rsb outliers, resulting in an increased  
292 differentiation between them (Figure 1). H-scan and Rsb outliers also displayed a  
293 lower RTH compared to genomic background (all P-values  $< 2.2.10^{-16}$  except for  
294 Turkish Rsb outliers for which P-value = 0.002), which is also consistent with  
295 selective sweeps where selection skews coalescence times towards the recent past for  
296 most (but not necessarily all) lineages (Rasmussen *et al.*, 2014). Eventually, H-scan  
297 outliers displayed lower RTH than Rsb outliers (all P-values  $< 2.2.10^{-16}$ ), which  
298 confirms that this test tended to detect more recent sweeps than the Rsb.

299

### 300 *Overlap between outputs from the four different approaches*

301 As expected given the specificity of each test, we found little overlap between the  
302 outputs of the four different tests (Figure 3A). Out of a total of 1,262 and 1,617 genes  
303 under positive selection, only 49 and 58 genes were common to the H-scan and Rsb  
304 approaches in the eastern and the western population respectively. Similarly, little  
305 overlap (10 genes in total) was observed between the environmental association  
306 analysis and the Rsb or H-scan tests (Figure 3A). No overlap was observed between  
307 the gene sets detected to be under selection with the coalescence approach and with  
308 any the three other tests.

309 *Genomic regions affected by positive selection*

310 We also tested whether distinct loci/genomic regions were affected by recent positive  
311 selection (Rsb and H-scan outliers combined) in the two populations using linear  
312 models. We found no association between the density of genes under selection in the  
313 eastern and western populations on chromosomes 2 and 3 (p-value = 0.4 and 0.3  
314 respectively), which indicates that, as observed on Figure 3D, distinct regions are  
315 affected by positive selection on these two chromosomes. We found a significant  
316 association between these variables on chromosomes 1, 4 and 5 (p-value = 0.004,  
317 1.07e-11 and 0.02 respectively). In these latter cases, however,  $R^2$  were small (7.366e-  
318 05, 0.0004 and 4.42e-05) suggesting that many regions affected by selection remain  
319 specific to each population on these chromosomes as well, as depicted on Figure 3D.

320

321 *Identification of candidate genes in known QTL regions*

322 Combining association mapping and analyses of selection constitutes a powerful  
323 approach to identify candidate genes and to address their selective regime. We  
324 identified many candidate regions harboring resistance genes. As a proof of concept,  
325 we aimed at assessing whether regions identified as resistance loci against known  
326 pathogens were also highlighted in our scans of selection. In *B. distachyon*, the  
327 genetic basis of resistance to the rust fungus *Puccinia brachypodii* has been  
328 deciphered through a QTL mapping (Barbieri *et al.*, 2012) which showed that leaf-  
329 rust resistance is controlled by three main QTL located on chromosome 2 (from  
330 nucleotide 37,949,269 to 40,903,216), 3 (from nucleotide 13,943,000 to 14,512,222)  
331 and 4 (from nucleotide 9,649,152 to 10,679,750). For the rest of the study, these  
332 regions will be referred to as QTL<sub>rust-2</sub>, QTL<sub>rust-3</sub> and QTL<sub>rust-4</sub>.

333 We screened these three regions for evidence of selection and found strong Rsb  
334 signals in QTL<sub>rust-3</sub> and QTL<sub>rust-4</sub> (Figure 4A). These regions were not detected as  
335 outliers with any other test but belonged to the top 0.05% p-values of Rsb outliers.  
336 The Rsb signal in QTL<sub>rust-3</sub> reaches its highest point in a serine/threonine phosphatase  
337 (Bradi3g16320: 14,486,831- 14,488,838; Figure 4A, left panel) and 60 kb upstream  
338 the QTL peak identified in this region (Barbieri *et al.*, 2012). The two adjacent Rsb  
339 signals in QTL<sub>rust-4</sub> reach their highest point into two NBS-LRR resistance genes  
340 (Bradi4g10153: 9,807,879-9,812,927; and Bradi4g10171: 9,828,236-9,835,003;  
341 Figure 3A, right panel). These two genes are respectively located 6 kb and 22 kb

342 upstream the QTL peak. We observed extended haplotypes in the eastern population  
343 in both QTL<sub>rust-3</sub> and QTL<sub>rust-4</sub> (Figure 4B). Congruent with the signal detected by the  
344 Rsb test, the large majority of the eastern accessions displayed the extended haplotype  
345 in these regions, indicating a nearly completed selective sweep, especially in QTL<sub>rust-4</sub>  
346 (Figure 4B).

347 QTL<sub>rust-4</sub> showed a striking enrichment for genes involved in defense response  
348 (displayed by grey boxes in Figure 4A, P-value = 8E-09) and in immune signaling  
349 process such as phosphorylation (P-value = 5.6E-06). Among 113 genes covered by  
350 QTL<sub>rust-4</sub>, 40 correspond either to a gene with a NBS-LRR, a receptor-like protein  
351 kinase (RLK) or a F-box domains, three types of genes that can confer resistance in  
352 plants. The presence of such a large gene clusters, as found in other regions of the  
353 genome (Table S2), further demonstrates the importance of narrowing down regions  
354 under selection to top outlier genes for unbiased GO annotation.

355

356

## 357 **Discussion**

358 Assessing the time and spatial scales at which selection acts is a key to understand  
359 how genetic diversity is maintained or lost through adaptation (Stinchcombe &  
360 Hoekstra, 2008; Fuller *et al.*, 2015). In plants, and especially in grasses, this question  
361 has been largely restricted to crops, which biases our understanding of evolutionary  
362 processes that have shaped genomes in their natural ancestors and extant relatives. In  
363 this study, we investigate the selective forces influencing adaptation in two  
364 populations consisting of 44 natural accessions of the wild Mediterranean grass  
365 *B. distachyon*. We found that ancient balancing and recent positive selection left  
366 distinct signatures on specific gene categories, and that positive selection affects  
367 distinct loci across the two populations. Importantly, our results support a role for  
368 pathogens in driving population differentiation and confirm that GWSS constitute  
369 effective approaches to pinpoint candidate genes as a complement to classical trait  
370 mapping.

371

### 372 *Time- and space-varying selection is shaping diversity in B. distachyon*

373 The ending of the last glaciation period 10,000 years ago led to drastic and recent  
374 changes of plant communities in Eurasia (Svenning *et al.*, 2008; Binney *et al.*, 2017).

375 At that time, climate warmed and species distribution expanded over Europe (Hewitt,  
376 1999). Pollen-based studies show that vegetation expansion was fast, reaching up to  
377 2km per year for some species (Hewitt, 1999). To our knowledge, no fossil pollen  
378 records are available for *B. distachyon*, which prevents reconstructing the  
379 geographical distribution of this species before and during the last ice age. Yet, a  
380 previous study showed that the two populations analyzed here experienced a severe  
381 population size reduction during the last glaciation followed by a rapid expansion  
382 within the last 10,000 years (Stritt *et al.*, in press). Even though unraveling the history  
383 of populations in southern peninsulas is more complex than in northern regions  
384 (Hewitt, 2000; Feliner, 2011), these results are congruent with the recent global  
385 postglacial recolonization of Europe by plants (Hewitt, 1999; Svenning *et al.*, 2008;  
386 Binney *et al.*, 2017) and imply that *B. distachyon* populations had to adapt to newly  
387 colonized habitats in the recent past.

388 Balancing selection associated to spatial heterogeneity (Richman, 2000;  
389 Charlesworth, 2006; Fijarczyk & Babik, 2015; Wu *et al.* 2017) may have maintained  
390 ancestral polymorphisms over long periods of time in natural populations of  
391 *B. distachyon*. Our environmental association analysis indeed shows that loci  
392 associated to bioclimatic variables display higher diversity, older alleles and more  
393 shared variation between regional groups when compared to genomic background.  
394 We exclusively focused the analysis on bioclimatic variables that displayed variation  
395 across localities and not between (Figure 2D). This approach, together with our  
396 relatively small sample size, could explain why this analysis highlighted fewer genes  
397 than the other methods used in the rest of the study. Our observations nonetheless  
398 suggest that adaptation to climate after recolonization does not necessarily involve *de*  
399 *novo* mutations, even after strong bottlenecks. As a further support of balancing  
400 selection, we identified an even older set of shared polymorphisms with a coalescence  
401 approach. The environmental heterogeneity encountered by *B. distachyon* populations  
402 (Lopez-Alvarez *et al.*, 2015) thus seems to have provided selective pressure strong  
403 enough to maintain polymorphisms over long periods of time within each population.  
404 This result is congruent with a previous analysis of natural populations of  
405 *B. distachyon* originating exclusively from Turkey (Dell'Acqua *et al.*, 2014) which  
406 showed, at a smaller geographical scale than the one investigated here, that  
407 populations are adapted to local habitats (Dell'Acqua *et al.*, 2014).

408 On the other hand, we also found evidence for positive selection acting on younger  
409 polymorphisms with both the Rsb and H-scan tests. These tests also revealed that  
410 positive selection is targeting different loci in the two populations. Interestingly, these  
411 loci appear to be non-randomly distributed along chromosomes (Figure 3D). As  
412 recombination rate is relatively high in *B. distachyon* (Huo *et al.*, 2011), we do not  
413 believe that this pattern is due to extended linkage disequilibrium and the subsequent  
414 process of linked selection along such large genomic regions (Cutter & Payseur,  
415 2013; Slotte, 2014). Rather, the peaks of selection we identified were narrow and  
416 allowed to pinpoint genes (Figure 4), indicating that while *B. distachyon* is primarily  
417 inbreeding, outcrossing events must be frequent enough to limit extended linkage  
418 disequilibrium. This is also congruent with the higher level of heterozygosity we  
419 observed here in *B. distachyon* compared to other selfing plants such as *A. thaliana*  
420 (Platt *et al.*, 2010). Whether these regions form islands of divergence and result from  
421 a complex interaction between recombination rate variation, gene flow and selection  
422 (Renaut *et al.*, 2013; Samuk *et al.*, 2017) remains to be investigated. As we obtained  
423 enrichments for different GO terms in the eastern and western populations, our study  
424 nonetheless shows that contrasting abiotic and biotic factors are shaping population  
425 diversity at different regions of the genome of *B. distachyon* through positive  
426 selection.

427 *B. distachyon* occurs exclusively in Mediterranean habitats which may appear at a  
428 first glance to be homogeneous and unlikely to promote local adaptation. Our results  
429 defeat this prediction and revealed that natural selection affected different genes and  
430 genomic regions across populations. Even though we identified more genes under  
431 positive than under balancing selection, it would be daring to conclude that the former  
432 selection regime, less challenging to detect (Delph & Kelly, 2014), is a predominant  
433 process shaping diversity in this species. Rather, we believe that we provide here  
434 genomic evidence that large-scale balancing selection also leads to the adaptation of  
435 *B. distachyon* populations to local environmental conditions.

436

#### 437 *Pathogens as a potential driving force of population evolution*

438 Host-pathogen interactions lead to a strong coevolutionary dynamics and are  
439 considered as a major factor shaping diversity (Karasov *et al.*; Fumagalli *et al.*, 2011;  
440 Krattinger & Keller, 2016a). Two main types of interaction have been proposed.

441 Under an arms race model, repeated innovation from both sides results in repeated  
442 fixation of advantageous alleles (Brown & Tellier, 2011). This interaction can  
443 therefore lead to positive selection that can be detected by tests focusing on extended  
444 haplotypes. The other type of interaction is often referred to as Red Queen dynamics  
445 or trench warfare, where alleles involved in the interaction are recycled by negative-  
446 frequency dependence and can therefore subsist for long periods of time in  
447 populations through balancing selection (Brown & Tellier, 2011).

448 Plant immune system machinery is complex. On one hand, it is composed of two tiers  
449 of extracellular and intracellular receptors (Krattinger & Keller, 2016a,b) that  
450 efficiently detect the presence of pathogens and constitute a first level of defense (for  
451 review Greeff *et al.*, 2012; Couto & Zipfel, 2016; Eckardt, 2017). Further  
452 mechanisms, such as oxidative bursts which are produced at an early stage in case of  
453 pathogen invasion, can act as additional levels of defense and prevent pathogen  
454 proliferation (Wojtaszek, 1997; Torres *et al.*, 2006; Fones & Preston, 2011; Sewelam  
455 *et al.*, 2016). In this study, we found a significant enrichment of signals of selection at  
456 genes involved in these two levels of defense in the eastern population. More  
457 specifically, we found many of well-characterized R-genes, i.e. genes displaying  
458 NBS-LRR domains (Mchale *et al.*, 2006; Jacob *et al.*, 2013; Liu *et al.*, 2014; Couto &  
459 Zipfel, 2016; Eckardt, 2017; Ooijen *et al.*, 2017), and genes involved into oxidative  
460 stress response to be under ongoing and/or disruptive selection in the eastern  
461 population (Table 1). On the other hand, we also found additional R-genes and genes  
462 involved in phosphorylation, a process especially important for immune signaling  
463 response in plants (for review Park *et al.*, 2012), to be under balancing selection. Our  
464 results are thus consistent with the two classical models of host-pathogens  
465 coevolution (Mondragón-palomino *et al.*, 2002; Mchale *et al.*, 2006; Gos *et al.*, 2012;  
466 Mace *et al.*, 2014; Zhong *et al.*, 2015; Wu *et al.*, 2017). Overall, and as shown in  
467 other organisms (Karasov *et al.* 2014; Fumagalli *et al.*, 2011; Krattinger & Keller,  
468 2016a,b; Bourgeois *et al.*, 2017), our genome-wide approach suggests that pathogens  
469 may constitute an important driving force of population and genome evolution in  
470 *B. distachyon*.

471 Surprisingly, the significant enrichments for resistance genes in the Rsb and H-scan  
472 outlier gene sets were only observed in the eastern population. The geographical  
473 origin of the populations could play a role in this pattern. The Middle East is indeed



474 the center of origin of many grasses, including *B. distachyon*, and of their associated  
475 pathogens (Wyand & Brown, 2003; Stukenbrock *et al.*, 2005; Opanowicz *et al.*, 2008;  
476 Hovmøller *et al.*, 2011). Many studies found that both resistance genes in plants and  
477 effector genes in pathogens can be organized in clusters evolving through an arm race  
478 resulting in a gene birth-and-death process (Michelmore & Meyers, 1998; Dong *et al.*,  
479 2015; Singh *et al.*, 2015). Because centers of origin are usually associated to higher  
480 diversity, it is therefore possible that a higher level of pathogen diversity drove  
481 selection at a larger number of resistance genes in the eastern population.

482 We can, however, not rule out technical biases inherent to the sampling design and to  
483 the history of the studied populations. The western population indeed experienced a  
484 stronger bottleneck than the eastern one (Stritt *et al.*, in press), which, together with  
485 the smaller geographical area sampled, may be responsible for the reduced nucleotide  
486 and haplotype diversity we observed in this population. In addition, the bottleneck  
487 may have led to longer haplotypes in the western population, which could explain  
488 why windows under positive selection were on average larger and contained more  
489 genes in this population than in the eastern one. Discriminating the effect of selection  
490 from the one of demography remains difficult in such bottlenecked populations (Long  
491 *et al.*, 2013). As a consequence, confounding effects may have resulted in the  
492 detection of more false positives and blurred the GO annotation in the western  
493 population. As we applied stringent filtering criteria and used approaches which are  
494 expected to be robust to demographic history (Tang *et al.*, 2007), we nonetheless  
495 believe that we provide the community with a reliable set of candidate loci, even for  
496 the western population. It is worth noting that, despite no significant enrichment for  
497 defense response, footprints of positive selection at R-genes were also found in the  
498 western population. This indicates that while milder, pathogens may constitute a  
499 selection pressure in this population as well.

500

501 *GWSS as complementary approach to QTL and GWAS*

502 Disentangling the mechanisms that promote or prevent adaptation requires more  
503 integrated studies, using both experimentations in controlled conditions and methods  
504 to characterize genetic diversity in natural populations (Feder & Mitchell-olds, 2003;  
505 Stinchcombe & Hoekstra, 2008; Flood & Hancock, 2017). Several studies used  
506 GWSS to validate genes functionally characterized or previously identified through



507 GWAS and to propose stronger hypotheses on the mode of selection operating on  
508 traits relevant for adaptation (Roulin *et al.* 2016; Tang *et al.*, 2007; Fumagalli *et al.*,  
509 2011; Bourgeois *et al.* 2017). Following this idea, we inspected three QTL regions  
510 responsible for the resistance of *B. distachyon* to the leaf-rust fungus *Puccinia*  
511 *brachypodii*, a natural pathogen of *B. distachyon* expected to exert strong selection on  
512 natural accessions.

513 For two of these QTL regions, we found strong Rsb outliers and reduced haplotype  
514 diversity in the eastern cluster in the vicinity of the QTL peaks, but no sign of  
515 balancing selection. These results strongly indicate that large-scale positive selection  
516 is shaping rust resistance in *B. distachyon* natural populations, as suggested in other  
517 species (Dodds & Thrall, 2009; Chavan *et al.*, 2015). Interestingly, the QTL region  
518 identified on chromosome 3 displays a strong signal of selection in a serine/threonine  
519 phosphatase, a class of genes known for their role in defense response and stress  
520 signaling (País *et al.*, 2009; Durian *et al.*, 2016). The region identified on  
521 chromosome 4 is more complex and consists of a cluster of resistance and stress  
522 signaling genes. Nevertheless, and while other genes display evidence of positive  
523 selection, a strong peak of selection co-localizes with the peak of the QTL and points  
524 at two R-genes. Such genes have been shown to confer resistance to rust in other  
525 species (Bettgenhaeuser *et al.*, 2014) and constitute prime candidates for further  
526 functional characterization.

527 *B. distachyon* is closely related to major crop cereals as well as to grass species used  
528 for biofuel production. Translating research from *B. distachyon* to plants of  
529 agronomical and economical interest will require a deeper understanding of the  
530 genetic architecture of traits involved in the response to environmental stresses. The  
531 molecular basis of tolerance to various abiotic stresses such as drought, salt and cold  
532 has been investigated in this species (Luo *et al.*, 2011; Manzaneda, 2013; Carmo &  
533 Charron, 2014; Gordon *et al.*, 2014; Marais & Juenger, 2015; Sun *et al.*, 2015; Mur &  
534 Bosch, 2016). Here, we also highlighted cadmium pollution as a potential factor of  
535 selection in the eastern population. As pollution with heavy metals including  
536 cadmium has been reported in Turkey in regions where accessions were collected for  
537 this study (Bakirdere & Yaman, 2008; Mor & Ceylan, 2017), our results suggest that  
538 *B. distachyon* could be used to investigate the tolerance to this stress. As genetic  
539 transformation is highly efficient in this species relative to other grasses, we anticipate

540 that combining classical trait mapping analyses with GWSS will assist allele mining  
541 for additional eco-responsive traits.

542

### 543 *Conclusion*

544 Our results revealed widespread signatures of natural selection at genes involved in  
545 adaptation in *B. distachyon*. We also found that pathogens may constitute an  
546 important driving force of genetic diversity and evolution in this system. While we  
547 limited our analysis to classical point mutations, recent studies showed that copy  
548 number variants (CNVs) and transposable element polymorphisms are abundant  
549 across *B. distachyon* populations (Gordon *et al.*, 2017; Stritt *et al.*, in press). Hence,  
550 the important genomic resources currently developed in this species open new  
551 avenues of research to further investigate the role of structural variation in natural  
552 population evolution and adaptation. To date, *B. distachyon* remains a classical model  
553 for research on grass genomics with a strong orientation towards applied research.  
554 Thanks to the high quality of its reference genome and the existence of large  
555 collections of freely available natural accessions collected from the species native  
556 range, it also constitutes a prime system for studies in ecology, population genomics  
557 and evolutionary biology.

558

559

### 560 **Experimental procedures**

#### 561 *SNPs calling, population structure and genetic diversity*

562 We used paired-end Illumina sequencing data generated for 44 accessions of  
563 *B. distachyon* (Gordon *et al.*, 2017) originating from Spain (N=16), France (N=1),  
564 Turkey (N=23) and Iraq (N=4, Table S1 for information about the origin of the  
565 accessions and sequencing effort). Reads were aligned to the reference genome v2.0  
566 with BWA-MEM (standard settings; Li, 2013). After removing duplicates with  
567 Sambamba (Tarasov *et al.*, 2017), single nucleotide polymorphisms (SNPs) were  
568 called with Freebayes (Garrison & Marth, 2016). The output was then filtered by  
569 removing SNPs with more than 10 missing genotypes or more than 2 alleles, a quality  
570 lower than 20, a minor allele frequency of 0.05 and a mean depth lower than 20 or

571 higher than 200. Data were phased using the software BEAGLE V4 (Browning &  
572 Browning, 2007) using default settings.

573 We then used the program Admixture (Alexander & Novembre, 2009) to identify the  
574 genetic structure of the two populations. The analysis was run for K values from 1 to  
575 5, and the best model was determined as the model with the lowest cross-validation  
576 error. Summary statistics such as within-population nucleotide or haplotype diversity  
577 were computed with the R package PopGenome (Pfeifer *et al.*, 2014). Nucleotide or  
578 haplotype diversity values were square-root transformed to fit a normal distribution  
579 and a t-test was used to compare the two within-population distributions. Levels of  
580 heterozygosity were calculated with VCFtools (Danecek *et al.*, 2011) .

581

#### 582 *Detecting balancing selection with an environmental association analysis*

583 Bioclimatic variables were downloaded at a 30 arc-seconds resolution from  
584 <http://www.worldclim.org/> and extracted for each locality using the R libraries gdal  
585 and raster. We then picked seven bioclimatic variables (bio6, bio8, bio11, bio12,  
586 bio13, bio16, bio18) that displayed substantial variation within geographical groups,  
587 but little between them. Bio6, bio8, bio11, bio12, bio13, bio16 and bio18 correspond  
588 respectively to minimum temperature of coldest month, mean temperature of wettest  
589 quarter, mean temperature of coldest quarter, annual precipitation, precipitation of  
590 wettest month, precipitation of wettest quarter and precipitation of warmest quarter.  
591 As likely to be correlated, these variables were summarized in a principal components  
592 analysis (PCA) in R. The coordinates of the first axis were used to test for correlation  
593 between allele frequencies and environment in the R package GENABEL (Aulchenko  
594 *et al.*, 2007). We accounted for relatedness between samples using a PCA correction  
595 and used corrected P-values of association.

596

#### 597 *Detecting balancing selection with ancestral recombination graphs (ARG)*

598 We used the software ARGWeaver to detect additional candidate regions for  
599 balancing selection with a coalescence approach (Rasmussen *et al.*, 2014). We  
600 included in the analysis a subset of 12 accessions with high sequencing depth and  
601 covering the largest geographical range (6 accessions from each population) to limit  
602 computation time. We used a mutation rate of  $1.4 \times 10^{-9}$ /bp/generation, a  
603 recombination rate of  $5.9 \times 10^{-8}$ /bp/generation. Mutation rate was estimated by

604 aligning the orthologs of 100 genes and using rice as an out-group (divergence  
605 estimated at 40My (The international brachypodium Consortium, 2010)). Note that  
606 we subsequently used an outlier approach to identify the oldest polymorphisms  
607 present in the two populations (top 1% outliers). Therefore, potential biases inherent  
608 to the use of a molecular clock do not affect our analysis. ARGWeaver is also flexible  
609 with regard to recombination rate as it reconstructs ancestral recombination graphs  
610 and accommodates variable recombination rates and genealogies along the genome.  
611 The algorithm was run for 1000 iterations, using 20 discretized time steps, a  
612 maximum coalescence time of 3 million generations and a prior effective population  
613 size of 100,000 individuals.

614

#### 615 *Detecting disruptive positive selection*

616 We used the Rsb test (Tang *et al.*, 2007) to detect signatures of recent or almost  
617 completed hard sweeps. This test detects haplotypes that are positively selected in one  
618 population by using a second population as a contrast. While the output of the test  
619 provides P-value of significance, it also indicates in which population a given allele is  
620 under selection. Rsb statistics were computed for each SNP with the R package  
621 rehh2.0 (Gautier *et al.*, 2012) with default settings. We further visualized the  
622 extension of haplotypes at candidate regions using the bifurcation.diagram() function  
623 of the rehh.

624

#### 625 *Detecting ongoing positive selection within populations*

626 We eventually used the software H-scan (Schlamp *et al.*, 2016) to detect incomplete  
627 ongoing positive selection. To do so, we calculated average pairwise haplotypes  
628 lengths using the number of segregating sites spanned by each tract within each  
629 population. The statistics is expected to be larger as the number of extended  
630 haplotypes increases in a population. This method is specifically dedicated to the  
631 detection of ongoing sweeps where one (hard sweep) or several (soft sweep)  
632 haplotypes are under positive selection and provides statistics for each SNP. We ran  
633 the method on Turkish and Spanish accessions independently to detect selective  
634 sweeps within each geographical group.

635

636

637 *Testing for functional clustering*

638 We first performed a GO annotation for the 32,712 genes annotated in the reference  
639 genome (version 2.1) with Blast2GO (Conesa *et al.*, 2005). We then controlled for  
640 potential gene clustering by following the procedure described in (Al-Shahrour *et al.*,  
641 2010). The entire gene set of the reference genome was split into windows of 50  
642 consecutive genes. Windows were moved along chromosomes in steps of 25 genes to  
643 allow for half-window overlaps. Enrichment analyses of biological processes were  
644 then performed for all the generated windows with the R package GOstats (Falcon &  
645 Gentleman, 2017) using Fisher's exact test. P-values were subsequently adjusted for  
646 multiple testing with a Benjamin-Hochberg correction. Regions were considered  
647 significantly enriched for a biological process when they displayed a corrected P-  
648 value  $\leq 0.01$  and also harbored at least five genes associated to the given process.

649

650 *GWWS subsequent filtering*

651 Both the H-scan and the Rsb tests compute statistics at each SNP. To limit false  
652 positives, we first selected 10 kb windows displaying at least four significant SNPs  
653 within the top 1% outliers. Overlapping significant windows were merged. We  
654 narrowed down the selected windows by keeping only the genes located at and around  
655 (-10% of the peak value) each of the top 1% peaks of selection. For the association  
656 test, we also selected 10 kb windows displaying at least four significant SNPs, i.e.  
657 with a corrected P-value  $\leq 0.001$  ( $-\log_{10}(\text{P-value}) \geq 3$ ) and narrowed them down in the  
658 same manner. These filtering criteria, however, were not applied to the output of  
659 ARGweaver, which is a window-based approach and for which we only kept the top  
660 1% outlier windows.

661

662 *Overlap between the different approaches*

663 Venn diagrams were drawn with the R package Vennerable to visualize potential  
664 overlap between the different gene sets under selection. To compare the distribution  
665 along chromosomes of candidate genes for recent positive selection (H-scan and Rsb  
666 candidate genes combined) in each population, we used linear models where the  
667 density of selected genes along each chromosome identified in the eastern and  
668 western population (100,000 bins per chromosome) were entered as variables. We  
669 eventually used the function plotBed of the R package Sushi (Phanstiel, 2015) to

670 visualize the density of genes under positive selection as a heat map along each  
671 chromosome. The R package ggplot2 (Wickham, 2009) was used to display the  
672 density of all the annotated genes in the genome along each chromosome as a line.

673

#### 674 *Summary statistics and coalescence characterization at candidate loci*

675 Tajima's  $D$ ,  $F_{ST}$  and  $d_{XY}$  were computed in the R package PopGenome (v2.2.3) over  
676 5kb windows across the genome. We then compared values between windows  
677 overlapping with candidate regions and windows outside these regions. We extracted  
678 TMRCA and relative TMRCA halftime (RTH) from the output of ARGWeaver.  
679 Because the coalescence approach is window-based, summary statistics were  
680 averaged across windows including 300 non-recombining blocks (around 10kb  
681 windows). Significant windows were merged. We then compared TMRCA and RTH  
682 values between windows overlapping with candidate regions and those outside.

683

#### 684 *GO annotation of genes under selection*

685 For each test, we extracted the genes located in the filtered regions with bedtools  
686 (Quinlan & Hall, 2010). We then examined potential enrichment for biological  
687 processes for each of the selected gene sets with the R package GOstats (Falcon &  
688 Gentleman, 2017) using the Fisher's exact test. P-values were subsequently adjusted  
689 for multiple testing with a Benjamin-Hochberg correction. Gene sets were considered  
690 significantly enriched for a biological process when they displayed a P-value  $\leq 0.01$   
691 and harbored at least five genes associated to the given process. The ancestor and  
692 child terms of each significant process were determined using QuickGO  
693 (<http://www.ebi.ac.uk/QuickGO>) and used to simplify Fisher test outputs and keep  
694 non-redundant terms.

695

#### 696 *QTL for leaf-rust resistance validation*

697 A QTL analysis performed in *B. distachyon* revealed three genomic regions involved  
698 in the resistance to *P. brachypodii* (Barbieri *et al.*, 2012). The coordinates of these  
699 three QTL were extracted from (Barbieri *et al.*, 2012) from v.2.0 of the *B. distachyon*  
700 reference genome. We then assessed whether those three regions were identified as  
701 outliers in at least one of the tests of selection.

702

703 **Acknowledgements**

704 We thank the Genetic Diversity Center-ETH Zurich for providing access the Euler  
705 high-performance cluster. We also would like to thank Beat Keller's group as well as  
706 Simon Krattinger and Mahendra Mariadassou for their advises during the elaboration  
707 of the study. This work is supported by the Swiss National Science Foundation  
708 (PZ00P3\_154724). The work conducted by the U.S. Department of Energy Joint  
709 Genome Institute, a DOE Office of Science User Facility, is supported under Contract  
710 No. DE-AC02-05CH11231.

711

712 **Availability of data and materials**

713 The raw outputs of each GWWS will be archive upon acceptance of the manuscript.  
714 All whole-genome sequences data are available at the NCBI Sequence Read archive  
715 (SRA available in Gordon *et al.*, 2017).

716

717 **Conflict of interest**

718 There is no conflict of interest issue related to this work.

719

720 **Supporting Information**

721 Table S1: Geographical coordinates of the 44 accessions and sequencing effort.

722 Table S2: Significant GO terms in each 50 gene-window of the reference genome

723 Table S3: Genes under selection with functional annotation

724



725 **References**

- 726 **Al-Shahrour, Minguéz P, Marques-Bonet T, Gazave E, Navarro A, Dopazo J.**  
727 **2010.** Selection upon Genome Architecture: Conservation of Functional  
728 Neighborhoods with Changing Genes. *PLoS computational biology* **6**: e1000953.
- 729 **Alexander DH, Novembre J. 2009.** Fast Model-Based Estimation of Ancestry in  
730 Unrelated Individuals. *Genome research* **19**: 1655–1664.
- 731 **Aulchenko YS, Ripke S, Isaacs A, van Duijn CM. 2007.** GenABEL: an R library  
732 for genome-wide association analysis. *Bioinformatics* **23**: 1294–6.
- 733 **Bakirdere S, Yaman M. 2008.** Determination of lead , cadmium and copper in  
734 roadside soil and plants in Elazig , Turkey. *environmental monitoring Assessment*  
735 **136**: 401–410.
- 736 **Barbieri M, Marcel TC, Niks RE, Francia E, Pasquariello M, Mazzamurro V,**  
737 **Garvin DF. 2012.** QTLs for resistance to the false brome rust *Puccinia brachypodii*  
738 in the model grass. *Genome* **163**: 152–163.
- 739 **Bettgenhaeuser J, Gilbert B, Ayliffe M, Moscou MJ. 2014.** Nonhost resistance to  
740 rust pathogens – a continuation of continua. *frontiers in plant science* **5**: 1–15.
- 741 **Binney H, Edwards M, Macias-fauria M, Lozhkin A, Anderson P, Kaplan JO,**  
742 **Andreev A, Bezrukova E, Blyakharchuk T, Jankovska V, et al. 2017.** Vegetation  
743 of Eurasia from the last glacial maximum to present: Key biogeographic patterns.  
744 *Quaternary Science Reviews* **157**: 80–97.
- 745 **Bischoff A, Crémieux L, Smilauerova M, Lawson CS, Mortimer SR, Dolezal J,**  
746 **Edwards AR, Brook AJ, Macel M, Leps JAN, et al. 2006.** Detecting local  
747 adaptation in widespread grassland species – the importance of scale and local plant  
748 community. *journal of ecology* **94**: 1130–1142.
- 749 **Bourgeois Y, Roulin AC, Müller K, Ebert D. 2017.** Parasitism drives host genome  
750 evolution: Insights from the *Pasteuria ramosa* - *Daphnia magna* system. *Evolution*  
751 **71**:1106–13.
- 752 **Brown JKM, Tellier A. 2011.** Plant-parasite coevolution: bridging the gap between  
753 genetics and ecology. *Annual Review of Phytopathology* **49**: 345–67.
- 754 **Browning SR, Browning BL. 2007.** Rapid and Accurate Haplotype Phasing and  
755 Missing-Data Inference for Whole-Genome Association Studies By Use of  
756 Localized Haplotype Clustering. *the american journal of human genetics* **81**: 1084–  
757 1097.
- 758 **Carmo S Do, Charron J. 2014.** Comparative analysis of the cold acclimation and



- 759 freezing tolerance capacities of seven diploid *Brachypodium distachyon* accessions.  
760 *Annals of botany* **113**: 681–693.
- 761 **Ceballos, G., Davidson, A., List, R., Pacheco, J., Manzano-Fisher, P., Santos-**  
762 **Barrera, G., Cruzado J. 2010.** Rapid Decline of a Grassland System and Its  
763 Ecological and Conservation Implications. *PloS one* **5**: e8562.
- 764 **Charlesworth D. 2006.** Balancing selection and its effects on sequences in nearby  
765 genome regions. *PLoS Genetics* **2**: e64.
- 766 **Chavan S, Gray J, Smith SM. 2015.** Diversity and evolution of Rp1 rust resistance  
767 genes in four maize lines. *Theoretical and Applied Genetics* **128**: 985–998.
- 768 **Clayton WD. 1981.** Evolution and Distribution of Grasses. *Annals of the Missouri*  
769 *Botanical Garden* **68**: 5–14.
- 770 **Conesa A, Götz S, García-Gómez JM, Terol J, Talón M, Robles M. 2005.**  
771 Blast2GO: a universal tool for annotation, visualization and analysis in functional  
772 genomics research. *Bioinformatics* **21**: 3674–6.
- 773 **Couto D, Zipfel C. 2016.** Regulation of pattern recognition receptor signalling in  
774 plants. *nature reviews immunology* **16**: 537–552.
- 775 **Cruickshank TE, Hahn MW. 2014.** Reanalysis suggests that genomic islands of  
776 speciation are due to reduced diversity, not reduced gene flow. *Molecular Ecology*  
777 **23**: 3133–3157.
- 778 **Cutter AD, Payseur BA. 2013.** Genomic signatures of selection at linked sites□:  
779 unifying the disparity among species. *Nature reviews Genetics* **14**: 262–274.
- 780 **Danecek P, Auton A, Abecasis G, Albers CA, Banks E, Depristo MA, Handsaker**  
781 **RE, Lunter G, Marth GT, Sherry ST, et al. 2011.** The variant call format and  
782 VCFtools. *Bioinformatics* **27**: 2156–2158.
- 783 **Dell'Acqua MD, Zuccolo A, Tuna M, Gianfranceschi L, Pè ME. 2014.** Targeting  
784 environmental adaptation in the monocot model *Brachypodium distachyon*□: a  
785 multi-faceted approach. *BMC Genomics* **15**: 801.
- 786 **Delph LF, Kelly JK. 2014.** On the importance of balancing selection in plants Lynda.  
787 *New phytologist* **201**: 1–22.
- 788 **Des Marais DL, Juenger TE. 2015.** *Brachypodium* and the Abiotic Environment. In:  
789 Vogel J, editor. *Genetics and Genomics of Brachypodium*, 291–311.
- 790 **Dodds P, Thrall P. 2009.** Recognition events and host–pathogen co-evolution in  
791 gene-for- gene resistance to flax rust. *Functional plant biology* **36**: 395–408.
- 792 **Dong S, Raffaele S, Kamoun S. 2015.** ScienceDirect The two-speed genomes of

- 793 filamentous pathogens: waltz with plants. *Current Opinion in Genetics &*  
794 *Development* **35**: 57–65.
- 795 **Durian G, Rahikainen M, Alegre S, Brosché M. 2016.** Protein Phosphatase 2A in  
796 the Regulatory Network Underlying Biotic Stress Resistance in Plants. *frontiers in*  
797 *immunology* **7**: 1–17.
- 798 **Eckardt NA. 2017.** The Plant Cell Reviews Plant Immunity: Receptor-Like  
799 Kinases, ROS-RLK Crosstalk, Quantitative Resistance, and the Growth / Defense  
800 Trade-Off. *Plant cell* **29**: 601–602.
- 801 **Falcon SÃ, Gentleman R. 2017.** Using GOSTats to test gene lists for GO term  
802 association. *Bioinformatics* **23**: 257–258.
- 803 **Feder ME, Mitchell-olds T. 2003.** Evolutionary and ecological functional genomics.  
804 *Nature reviews Genetics* **4**: 649–655.
- 805 **Feliner GN. 2011.** Southern European glacial refugia: A tale of tales. *taxon* **60**:  
806 365–372.
- 807 **Fijarczyk A, Babik A. 2015.** Detecting balancing selection in genomes: limits and  
808 prospects. *Molecular ecology* **24**: 3529–3545.
- 809 **Flood J, Hancock AM. 2017.** ScienceDirect The genomic basis of adaptation in  
810 plants. *Current opinion in plant biology* **36**: 88–94.
- 811 **Fones H, Preston GM. 2011.** Reactive oxygen and oxidative stress tolerance in plant  
812 pathogenic Pseudomonas. *FEMS Microbiology letter* **1**: 1–8.
- 813 **Fuller ZL, Niño EL, Patch HM, Bedoya-Reina OC, Baumgarten T, Muli E,**  
814 **Mumoki F, Ratan A, McGraw J, Frazier M, et al. 2015.** Genome-wide analysis  
815 of signatures of selection in populations of African honey bees (*Apis mellifera*)  
816 using new web-based tools. *BMC genomics* **16**: 518.
- 817 **Fumagalli M, Sironi M, Pozzoli U, Ferrer-admettla A, Pattini L. 2011.** Signatures  
818 of Environmental Genetic Adaptation Pinpoint Pathogens as the Main Selective  
819 Pressure through Human Evolution. *PLoS genetics* **7**: e1002355.
- 820 **Garrison E, Marth G. 2016.** Haplotype-based variant detection from short-read  
821 sequencing. Available at:<https://arxiv.org/abs/1207.3907>
- 822 **Gautier M, Vitalis R, Baillarguet D, Cedex F-M. 2012.** rehh: an R package to  
823 detect footprints of selection in genome-wide SNP data from haplotype structure.  
824 *Bioinformatics* **28**: 1176–1177.
- 825 **Gibson DJ. 2009.** *Grasses and grassland ecology* (Oxford university press, Ed.).
- 826 **Gordon SP, Contreras-Moreira B, Woods DP, Des Marais DL, Burgess D, Shu S,**

- 827 **Stritt C, Roulin AC, Schackwitz W, Tyler et al.** Extensive gene content  
828 hetlvariation in the *Brachypodium distachyon* pan-genome correlates with  
829 phenotypic variation. *Nature Communications* **8**: 2184
- 830 **Gordon SP, Priest H, Marais DL Des, Schackwitz W, Figueroa M, Martin J,**  
831 **Jennifer N, Tyler L, Lee C, Bryant D, et al. 2014.** Genome diversity in  
832 *Brachypodium distachyon*: deep sequencing of highly diverse inbred lines. *Plant*  
833 *Journal* **79**: 361–374.
- 834 **Gos G, Slotte T, Wright SI. 2012.** Signatures of balancing selection are maintained  
835 at disease resistance loci following mating system evolution and a population  
836 bottleneck in the genus *Capsella*. *BMC Evolutionary Biology* **12**: 152.
- 837 **Greeff C, Roux M, Mundy J, Petersen M. 2012.** Receptor-like kinase complexes in  
838 plant innate immunity. *frontiers in plant science* **3**: 1–7.
- 839 **Groves RH. 2000.** Temperate grasslands of the southern hemisphere. In: Jacobs  
840 SWL, Everett J, editors. *Grasses Systematics and Evolution*, 3781–3791.
- 841 **Hammond-kosack KE, Jones JDG. 1996.** Resistance Gene-Dependent Plant  
842 Defense Responses. *The Plant cell* **8**: 1773–1791.
- 843 **Hancock AM, Brachi B, Faure N, Horton MW, Jarymowycz LB, Sperone FG,**  
844 **Toomajian C, Roux F, Bergelson J. 2011.** Adaptation to climate across the  
845 *Arabidopsis thaliana* genome. *Science* **334**: 83–6.
- 846 **Hassl RJ, Payseur BA. 2016.** Detecting selection in natural populations: Making  
847 sense of genome scans and towards alternative solutions. *Molecular Ecology* **25**: 5–  
848 23.
- 849 **Helm A, Oja T, Saar L, Takkis K, Talve T, Pa M. 2009.** Human influence lowers  
850 plant genetic diversity in communities with extinction debt. *journal of ecology* **97**:  
851 1329–1336.
- 852 **Hermisson J. 2009.** Who believes in whole-genome scans for selection? *Heredity*  
853 **103**: 283–284.
- 854 **Hewitt GM. 1999.** Post-glacial re-colonization of European biota. *Biological journal*  
855 *of the Linnean society* **68**: 87–112.
- 856 **Hewitt G. 2000.** The genetic legacy of the Quaternary ice ages. *Nature* **405**: 907–913.
- 857 **Hovmøller MS, Sørensen CK, Walter S, Justesen AF. 2011.** Diversity of *Puccinia*  
858 *striiformis* on Cereals and Grasses. *Annual Review of Phytopathology* **49**: 197–220.
- 859 **Huang J, Pray C, Rozelle S. 2002.** Enhancing the crops to feed the poor. *Nature*  
860 **418**: 678–684.

- 861 **Huo N, Garvin DF, You FM, Luo SMM, Gu YQ, Lazo GR, Philip J. 2011.**  
862 Comparison of a high-density genetic linkage map to genome features in the model  
863 grass *Brachypodium distachyon*. *Theoretical and Applied Genetics* **123**: 455–464.
- 864 **Jacob F, Vernaldi S, Maekawa T. 2013.** Evolution and conservation of plant NLR  
865 functions. *frontiers in immunology* **4**: 1–16.
- 866 **Karasov TL, Horton MW, Bergelson J.** ScienceDirect Genomic variability as a  
867 driver of plant – pathogen coevolution? *Current Opinion in Plant Biology* **18**: 24–  
868 30.
- 869 **Kelley JL, Madeoy J, Calhoun JC, Swanson W, Akey JM. 2006.** Genomic  
870 signatures of positive selection in humans and the limits of outlier approaches.  
871 *Genome research*: **206**: 980–989.
- 872 **Kiviniemi K, Eriksson O. 2002.** Size-related deterioration of semi-natural grassland  
873 fragments in Sweden. *diversity and distribution* **8**: 21–29.
- 874 **Krattinger SG, Keller B. 2016a.** Tansley review Molecular genetics and evolution  
875 of disease resistance in cereals. *New phytologist*: 320–332.
- 876 **Krattinger SG, Keller B. 2016b.** Trapping the intruder — immune receptor domain  
877 fusions provide new molecular leads for improving disease resistance in plants.  
878 *Genome Biology* **17**:23.
- 879 **Latta RG. 2009.** Testing for local adaptation in *Avena barbata*: a classic example of  
880 ecotypic divergence. *Molecular Ecology* **18**: 3781–3791.
- 881 **Li H. 2013.** Aligning sequence reads, clone sequences and assembly contigs with  
882 BWA-MEM. preprint arXiv:1303.3997.
- 883 **Liu W, Frick M, Huel R, Nykiforuk CL, Wang X, Gaudet DA, Eudes F, Conner  
884 RL, Kuzyk A, Chen Q, et al. 2014.** The Stripe Rust Resistance Gene Yr10 Encodes  
885 an Evolutionary-Conserved and Unique CC – NBS – LRR Sequence in Wheat.  
886 *Molecular Plant* **7**: 1740–1755.
- 887 **Long Q, Rabanal FA, Meng D, Huber CD, Farlow A, Platzer A, Zhang Q,  
888 Vilhjálmsson BJ, Korte A, Nizhynska V, et al. 2013.** Massive genomic variation  
889 and strong selection in *Arabidopsis thaliana* lines from Sweden. *Nature genetics* **45**:  
890 884–890.
- 891 **Lopez-Alvarez D, Manzaneda AJ, Rey P, Giraldo P, Benavente E,  
892 Allainguillaume J et al. 2015.** Environmental niche variation and evolutionary  
893 diversification of the *Brachypodium distachyon* grass complex species in their  
894 native. *American journal of botany* **102**: 1073–1088.

- 895 **Luo N, Liu J, Yu X, Jiang Y. 2011.** Natural variation of drought response in  
896 *Brachypodium distachyon*. *physiologia plantarum* **141**: 19–29.
- 897 **Mace E, Tai S, Innes D, Godwin I, Hu W, Campbell B, Gilding E, Cruickshank**  
898 **A, Prentis P, Wang J, et al. 2014.** The plasticity of NBS resistance genes in  
899 sorghum is driven by multiple evolutionary processes. *BMC plant biology* **14**: 253.
- 900 **Manzaneda AJ, Rey PJ, Bastida JM, Weiss-Lehman C, Raskin E, Mitchell-Olds**  
901 **T. 2013.** Environmental aridity is associated with cytotype segregation and  
902 polyploidy occurrence in *Brachypodium distachyon* (Poaceae) Antonio. *New*  
903 *phytologist* **193**: 797–805.
- 904 **Mchale L, Tan X, Koehl P, Michelmore RW. 2006.** Plant NBS-LRR proteins □:  
905 adaptable guards. *Genome Biology* **7**: 212.
- 906 **Messer PW. 2015.** H-scan □: Detecting hard and soft sweeps in population genomic  
907 data. **3**: 1–4.
- 908 **Michelmore RW, Meyers BC. 1998.** Clusters of Resistance Genes in Plants Evolve  
909 by Divergent Selection and a Birth-and-Death Process. *Genome research* **530**:  
910 1113–1130.
- 911 **Mitchell-Olds T, Willis JH, Goldstein DB. 2007.** Which evolutionary processes  
912 influence natural genetic variation for phenotypic traits? *Nature reviews Genetics* **8**:  
913 845–56.
- 914 **Mondragón-palomino M, Meyers BC, Michelmore RW, Gaut BS. 2002.** Patterns  
915 of Positive Selection in the Complete NBS-LRR Gene Family of *Arabidopsis*  
916 *thaliana*. *Genome research* **12**: 1305–1315.
- 917 **Mor F, Ceylan S. 2017.** Cadmium and lead contamination in vegetables collected  
918 from industrial , traffic and rural areas in Bursa Province, Turkey. *Food Additives &*  
919 *Contaminants* □ **25**: 611–615.
- 920 **Morris GP, Ramu P, Deshpande SP, Hash CT, Shah T, Upadhyaya HD. 2013.**  
921 Population genomic and genome-wide association studies of agroclimatic traits in  
922 sorghum. *Proceedings of the National Academy of Sciences* **110**: 453–458.
- 923 **Mur LAJ, Bosch M. 2016.** Linking Dynamic Phenotyping with Metabolite Analysis  
924 to Study Natural Variation in Drought Responses of *Brachypodium distachyon*.  
925 *frontiers in plant science* **7**: 1–15.
- 926 **Nelson RM, Wallberg A, Sim P, Lawson DJ, Webster MT. 2017.** Genomewide  
927 analysis of admixture and adaptation in the Africanized honeybee. *Molecular*  
928 *Ecology* **26**: 3603–3617.

- 929 **Nielsen R. 2005.** Molecular Signatures of Natural Selection. *Annual Review of*  
930 *Genetics.* **39**: 197–218.
- 931 **Nutzmann H, Osbourn A. 2014.** Gene clustering in plant specialized metabolism.  
932 *current opinion in biotechnology* **26**: 91–99.
- 933 **Ooijen G Van, Mayr G, Kasiem MMA, Albrecht M, Cornelissen BJC, Takken**  
934 **FLW. 2017.** Structure – function analysis of the NB-ARC domain of plant disease  
935 resistance proteins. *journal of experimental botany* **59**: 1383–1397.
- 936 **Opanowicz M, Vain P, Draper J, Parker D, Doonan JH. 2008.** Brachypodium  
937 distachyon: making hay with a wild grass. *Trends in Plant Science* **13**: 172–177.
- 938 **País SM, Téllez-iñón MT, Capiati DA. 2009.** Serine / threonine protein  
939 phosphatases type 2A and their roles in stress signaling. *Plant signaling and*  
940 *behaviour* **4**: 1013–1015.
- 941 **Park C, Caddell DF, Ronald PC. 2012.** Protein phosphorylation in plant  
942 immunity: insights into the regulation of pattern recognition receptor-mediated  
943 signaling. *frontiers in plant science* **3**: 1–9.
- 944 **Pavlidis P, Jensen JD, Stephan W, Stamatakis A. 2012.** A Critical Assessment of  
945 Storytelling: Gene Ontology Categories and the Importance of Validating  
946 Genomic Scans Research article. *Molecular biology and evolution* **29**: 3237–3248.
- 947 **Phanstiel DH. 2015.** Sushi: Tools for visualizing genomics data. *R package version*  
948 *1.14.0*.
- 949 **Pfeifer B, Wittelsbürger U, Ramos-Onsins SE, Lercher MJ. 2014.** PopGenome:  
950 An efficient swiss army knife for population genomic analyses in R. *Molecular*  
951 *Biology and Evolution* **31**: 1929–1936.
- 952 **Platt A, Horton M, Huang YS, Li Y, Anastasio AE, Mulyati NW, Bossdorf O,**  
953 **Byers D, Donohue K, Dunning M, et al. 2010.** The Scale of Population Structure  
954 in *Arabidopsis thaliana*. *plos genetics* **6**: e1000843.
- 955 **Quinlan AR, Hall IM. 2010.** BEDTools: a flexible suite of utilities for comparing  
956 genomic features. *Bioinformatics* **26**: 841–842.
- 957 **Rasmussen MD, Hubisz MJ, Gronau I, Siepel A. 2014.** Genome-Wide Inference of  
958 Ancestral Recombination Graphs. *PLoS genetics* **10**: e1004342.
- 959 **Renaut S, Grassa CJ, Yeaman S, Moyers BT, Lai Z, Kane NC, Bowers JE, Burke**  
960 **JM, Rieseberg LH. 2013.** Genomic islands of divergence are not affected by  
961 geography of speciation in sunflowers. *Nature Communications* **4**: 1–8.
- 962 **Richman A. 2000.** Evolution of balanced genetic polymorphism. *Molecular Ecology*



- 963     **9:** 1953–1963.
- 964     **Roulin A, Bourgeois Y, Stiefel U, Walser J-C, Ebert D.** A photoreceptor underlies  
965     natural variation in *Daphnia magna* diapause induction. *Molecular Biology and*  
966     *Evolution.* **12:**3194–3204.
- 967     **Samuk K, Rennison DJ, Owens GL, Delmore KE, Miller SE, Schluter D. 2017.**  
968     Gene flow and selection interact to promote adaptive divergence in regions of low  
969     recombination. *Molecular Ecology* **26:** 4378–4390.
- 970     **Savolainen O, Lascoux M, Merilä J. 2013.** Ecological genomics of local adaptation.  
971     *Nature reviews Genetics* **14:** 807–820.
- 972     **Schlamp F, Van Der Made J, Stambler R. 2016.** Evaluating the performance of  
973     selection scans to detect selective sweeps in domestic dogs. *Molecular Ecology* **25:**  
974     342–356.
- 975     **Sewelam N, Kazan K, Schenk PM. 2016.** Global Plant Stress Signaling□: Reactive  
976     Oxygen Species at the. **7:** 1–21.
- 977     **Singh S, Chand S, Singh NK, Sharma TR. 2015.** Genome-Wide Distribution ,  
978     Organisation and Functional Characterization of Disease Resistance and Defence  
979     Response Genes across Rice Species. *Plos one* **10:**e0125964
- 980     **Slavov GT, Nipper R, Robson P, Farrar K, Allison GG, Bosch M, Clifton-brown**  
981     **JC, Donnison IS, Jensen E. 2014.** Genome-wide association studies and prediction  
982     of 17 traits related to phenology, biomass and cell wall composition in the energy  
983     grass *Miscanthus sinensis*. *New phytologist* **201:** 1227–1239.
- 984     **Slotte T. 2014.** The impact of linked selection on plant genomic variation. *briefings*  
985     *in functional genomics* **13:** 268–275.
- 986     **Stamatakis A, Alachiotis N, Pavlidis P, Daniel Z. 2013.** SweeD□: Likelihood-  
987     Based Detection of Selective Sweeps in Thousands of Genomes. *Molecular biology*  
988     *and evolution* **30:** 2224–2234.
- 989     **Stinchcombe JR, Hoekstra HE. 2008.** Combining population genomics and  
990     quantitative genetics: finding the genes underlying ecologically important traits.  
991     *Heredity* **100:** 158–170.
- 992     **Stritt C, Gordon SP, Wicker T, Vogel JP, Roulin AC.** Transposable elements as a  
993     major source of genetic diversity: insights from genome-wide analyses of  
994     *Brachypodium distachyon* natural accessions. *Genome biology and evolution.* In  
995     press. Available at <https://doi.org/10.1093/gbe/evx276>.
- 996     **Stromberg C. 2011.** Evolution of Grasses and Grassland Ecosystems. *Annual review*

- 997 *of earth and planetary science* **39**: 517–544.
- 998 **Stukenbrock EH, Banke S, Javan-nikkhah M, Mcdonald BA. 2005.** Origin and  
999 Domestication of the Fungal Wheat Pathogen *Mycosphaerella graminicola* via  
1000 Sympatric Speciation. *Molecular biology and evolution* **24**: 398–411.
- 1001 **Sun J, Hu W, Zhou R, Wang L. 2015.** The Brachypodium distachyon BdWRKY36  
1002 gene confers tolerance to drought stress in transgenic tobacco plants. *Plant cell*  
1003 *reports* **34**: 23–35.
- 1004 **Svenning J, Normand S, Kageyama M. 2008.** Glacial refugia of temperate trees in  
1005 Europe: insights from species distribution modelling. *journal of ecology* **96**: 1117–  
1006 1127.
- 1007 **Tajima F. 1989.** Statistical method for testing the neutral mutation hypothesis by  
1008 DNA polymorphism. *Genetics* **123**: 585–95.
- 1009 **Takos AM, Knudsen C, Lai D, Kannangara R, Mikkelsen L, Motawia MS, Olsen**  
1010 **CE, Sato S, Tabata S, Jørgensen K, et al. 2011.** Genomic clustering of cyanogenic  
1011 glucoside biosynthetic genes aids their identification in *Lotus japonicus* and  
1012 suggests the repeated evolution of this chemical defence pathway. *Plant Journal* **68**:  
1013 273–286.
- 1014 **Tang K, Thornton KR, Stoneking M. 2007.** A New Approach for Using Genome  
1015 Scans to Detect Recent Positive Selection in the Human Genome. *PLoS biology*  
1016 **5**:e171
- 1017 **Tarasov A, Vilella AJ, Cuppen E, Nijman IJ, Prins P. 2017.** Genome analysis  
1018 Sambamba: fast processing of NGS alignment formats. *Bioinformatics* **31**: 2032–  
1019 2034.
- 1020 **The international brachypodium Consortium. 2010.** Genome sequencing and  
1021 analysis of the model grass *Brachypodium distachyon*. *Nature* **463**: 763–8.
- 1022 **Torres MA, Jones JDG, Dangl JL. 2006.** Reactive Oxygen Species Signaling in  
1023 Response to Pathogens. **141**: 373–378.
- 1024 **Turchin MC, Chiang CWK, Palmer CD, Sankararaman S, Reich D,**  
1025 **Investigation G, Giant T, Hirschhorn JN. 2012.** Evidence of widespread selection  
1026 on standing variation in Europe at height-associated SNPs. *Nature Genetics* **44**:  
1027 1015–1019.
- 1028 **Tyler AL, Lee SJ, Young ND, Deiulio GA, Benavente E, Reagon M, Sysopha J,**  
1029 **Baldini RM, Troia A, Hazen SP, et al. 2016.** Population structure in the model  
1030 grass *Brachypodium distachyon* is highly correlated with flowering differences



1031 across broad geographic areas. *The Plant Genome* **9**:1–55.

1032 **Wadgymar SM, Lowry DB, Gould BA, Byron CN, Mactavish RM, Anderson JT.**

1033 **2017.** Identifying targets and agents of selection: innovative methods to evaluate the

1034 processes that contribute to local adaptation. *Methods in Ecology and Evolution* **8**:

1035 738–749.

1036 **Wallace JS, Batchelor CH. 1997.** Managing water resources for crop production.

1037 *Philosophical transactions of the Royal Society of London. Series B, Biological*

1038 *sciences* **352**: 937–947.

1039 **Wickham H. 2009.** ggplot2: Elegant Graphics for Data Analysis. Springer-Verlag

1040 New York.

1041 **Wojtaszek P. 1997.** Oxidative burst□: an early plant response to pathogen infection.

1042 *biochemical journal* **692**: 681–692.

1043 **Wu Q, Han T, Chen X, Chen J, Zou Y, Li Z, Xu Y. 2017.** Long-term balancing

1044 selection contributes to adaptation in Arabidopsis and its relatives. *Genome biology*

1045 **18**: 217.

1046 **Wyand RA, Brown K. 2003.** Genetic and forma specialis diversity in Blumeria

1047 graminis of cereals and its implications for host-pathogen co-evolution. *Molecular*

1048 *plant pathology* **4**: 187–198.

1049 **Zhong Y, Li Y, Huang K, Cheng Z. 2015.** Species-specific duplications of NBS-

1050 encoding genes in Chinese chestnut (*Castanea mollissima*). *Scientific reports* **5**:

1051 16638.

1052

1053

1054

1055

1056

1057

1058

1059

1060

1061

1062

1063

1064

1065 **Figures**

1066

1067 **Figure 1: Schematic representation of the regimes of selection analyzed in this**  
1068 **study**

1069 In the case of association between SNPs and environmental variables displaying  
1070 variation within population, shared polymorphisms will be maintained across the two  
1071 populations. The same outcome is expected under long-term balancing selection. The  
1072 Rsb test, on the other hand, detects mutations that rose in frequency and reached near  
1073 fixation in one of the two populations. The H-scan test targets mutations currently  
1074 under selection and rising in frequency in one of the two populations.

1075

1076 **Figure 2: Geographical origin and genetic diversity of the 44 accessions**

1077 A) Geographical origin of the 44 accessions used in the study. Blue and orange dots  
1078 represent accessions from the western and eastern population respectively. The  
1079 asterisk indicates the origin of the reference accession Bd21 B) Structure plot. Each  
1080 bar represents the genetic data of one accession. An accession presents some  
1081 admixture when the bar displays different colors. The high of the bar is proportional  
1082 to the admixture level C) Nucleotide diversity (in 5 kb windows) with the eastern and  
1083 western population D) PCA summarizing bioclimatic variables varying within the  
1084 eastern and western population.

1085

1086 **Figure 3: Venn diagram and descriptive statistics for each test of selection**

1087 A) Overlap between environmental association, H-scan and Rsb results in the eastern  
1088 and western populations, in number of genes B) Number of genes per window after  
1089 keeping the genes located at and in the vicinity of each peak of selection C)  
1090 Comparison between genome-wide (GW) Tajima's D and Tajima's D in regions  
1091 under the different selection regimes tested D) Overall gene density (line) and heat  
1092 maps displaying the density of genes under positive selection (Rsb + H-scan) along  
1093 the five chromosomes in the eastern (E) and western (W) populations.

1094

1095 **Figure 4: QTL involved in resistance to rust**

1096 A) Rsb signals observed in QTL<sub>rust-3</sub> (left panel) and QTL<sub>rust-4</sub> (right panel). The  
1097 dashed line indicates the 0.1%  $-\log_{10}(\text{Rsb P-values})$  outlier threshold. Note that in  
1098 order to reduce the size of the figure, points with  $-\log_{10}(\text{Rsb P-values})$  values  $<1$  are  
1099 not displayed. Grey boxes display the position of gene potentially involved in defense

1100 response (genes with NBS-LRR, F-box or RLK domains) if present in the region B)  
1101 Haplotype bifurcation diagram in sub-regions displaying strong Rsb outliers. Left  
1102 panel: zoom in on chromosome 3; right panel: zoom in on chromosome 4. The  
1103 diagrams visualize the breakdown of LD at increasing distances from the selected  
1104 focal SNP, displayed by a vertical black line. Each horizontal blue line represents a  
1105 haplotype. Each accession is represented by two lines, one for each haplotype.  
1106 Horizontal blue lines are merged when two accessions share the same haplotype. The  
1107 thickness of the line is therefore correlated to the number of accessions sharing the  
1108 same haplotype.

1109

1110

## 1111 **Tables**

### 1112 **Table 1: Significant GO term associated to each test of selection**

1113

1114

**A**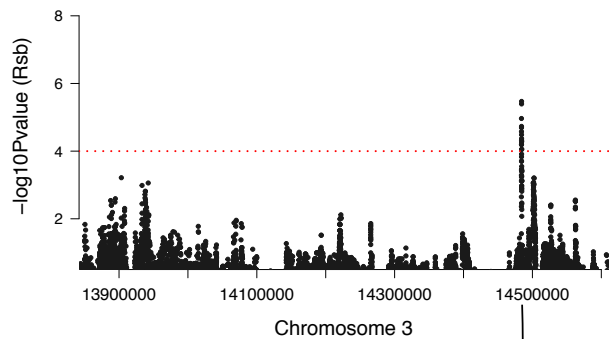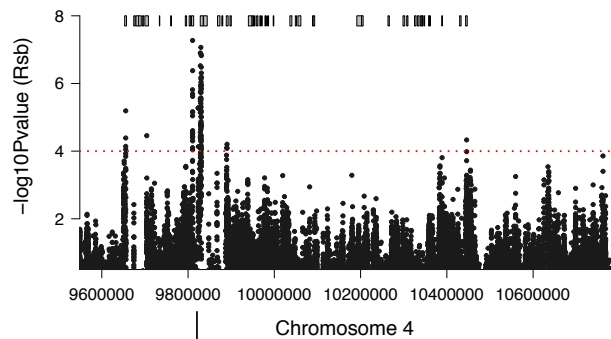**B**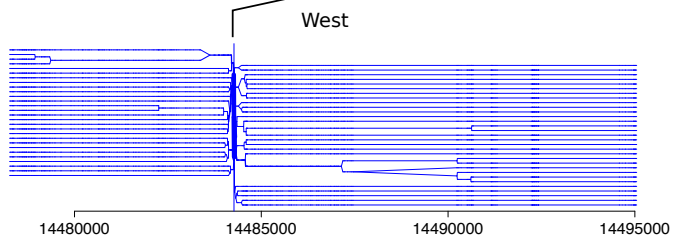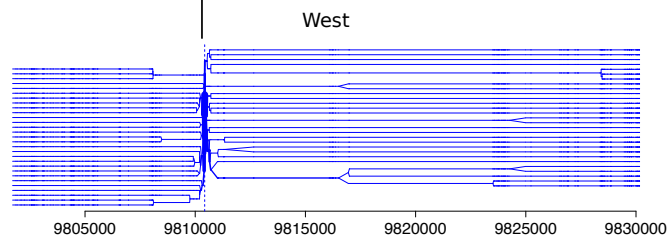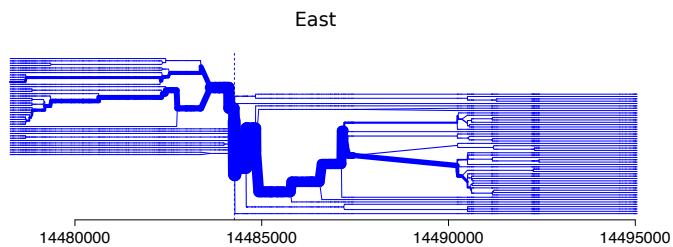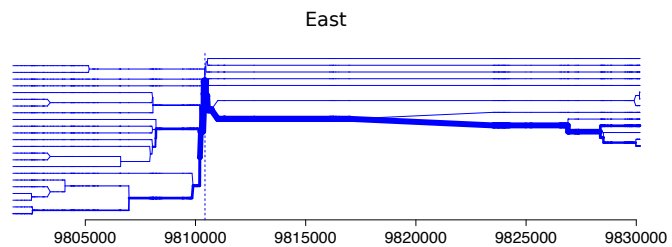

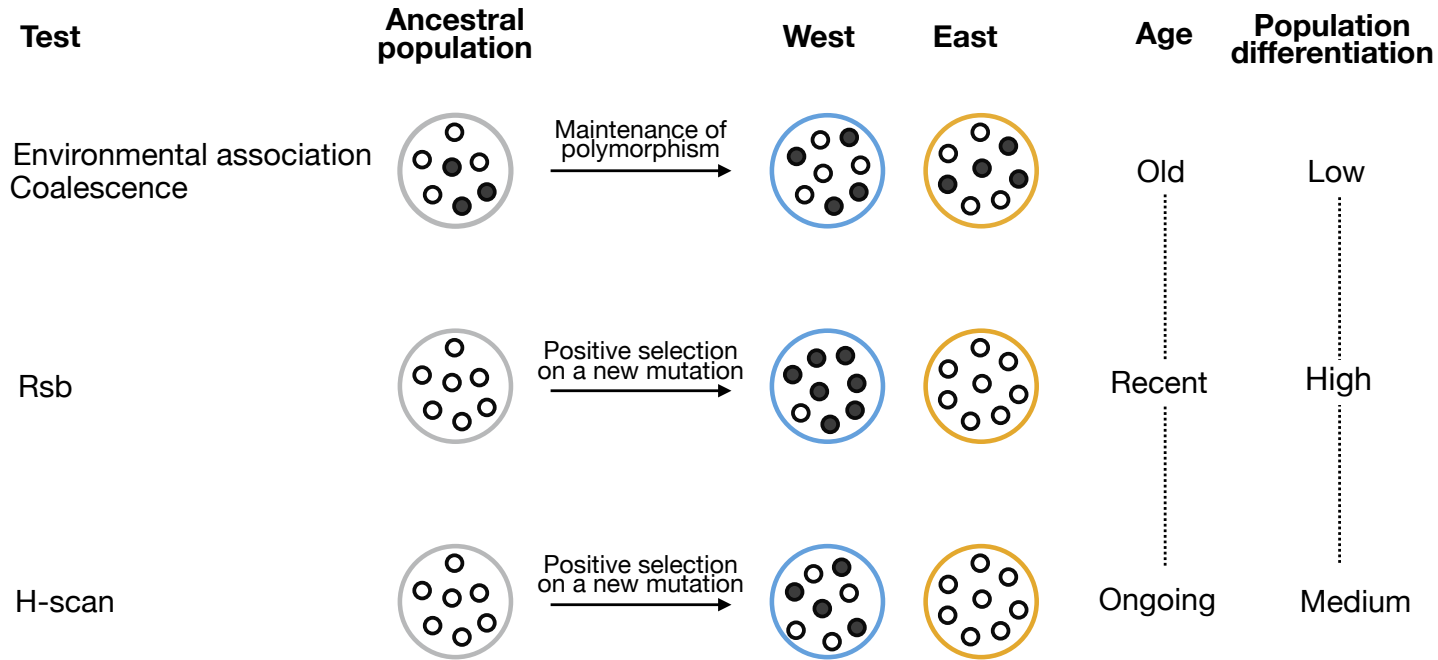

**A**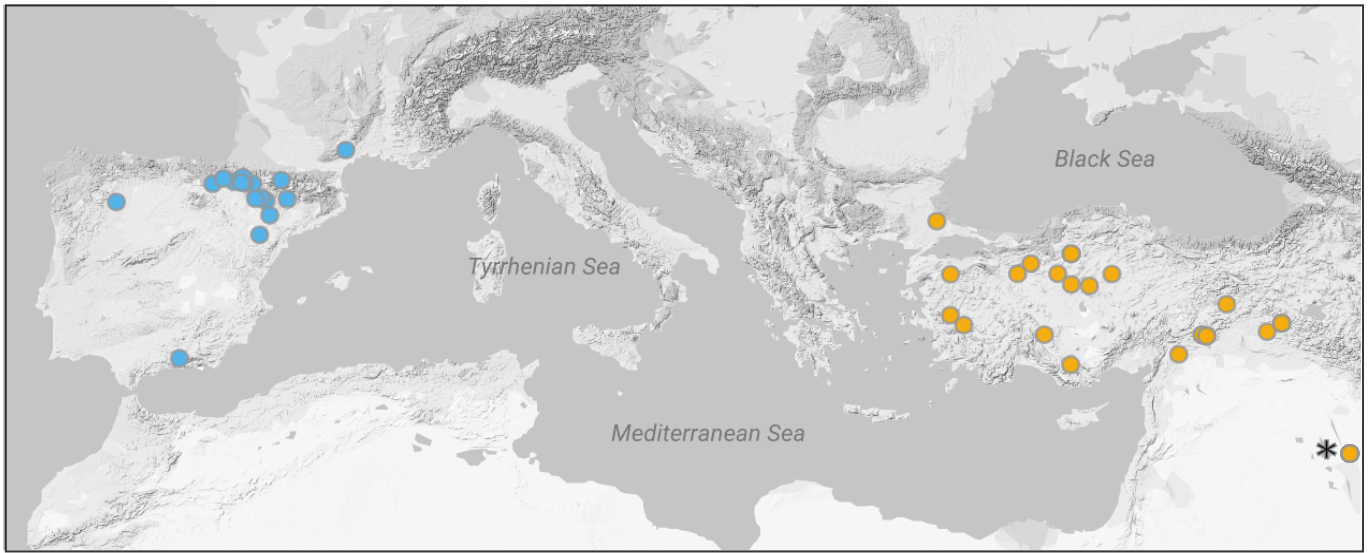**B**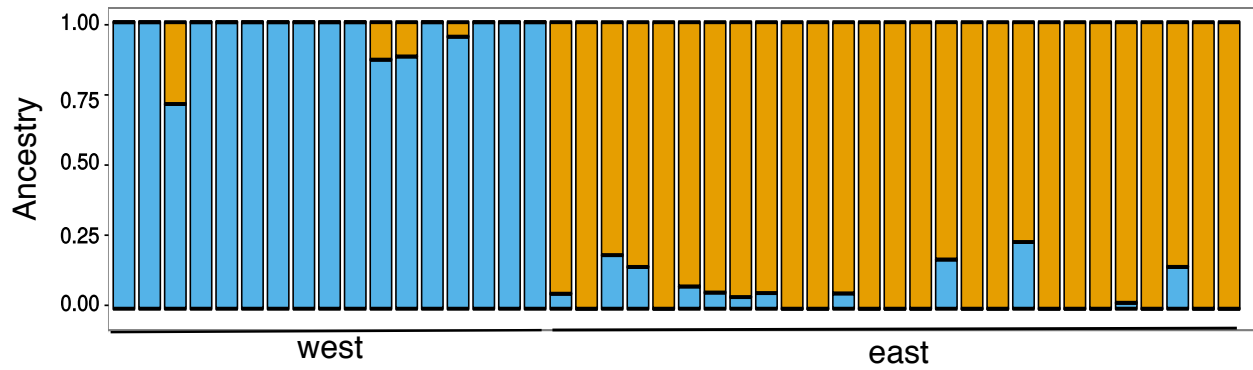**C**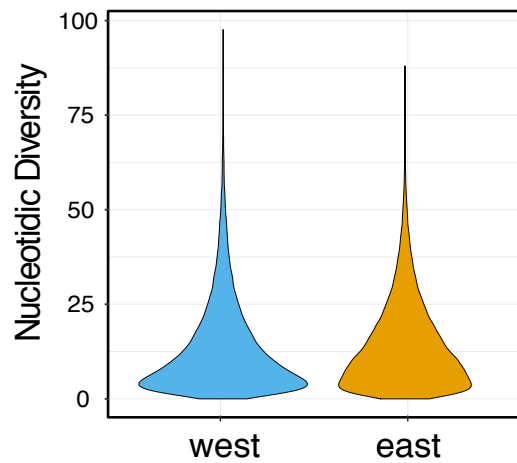**D**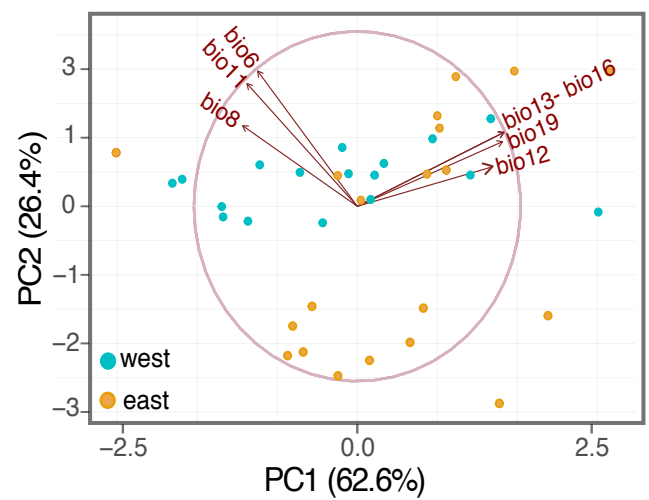

**A**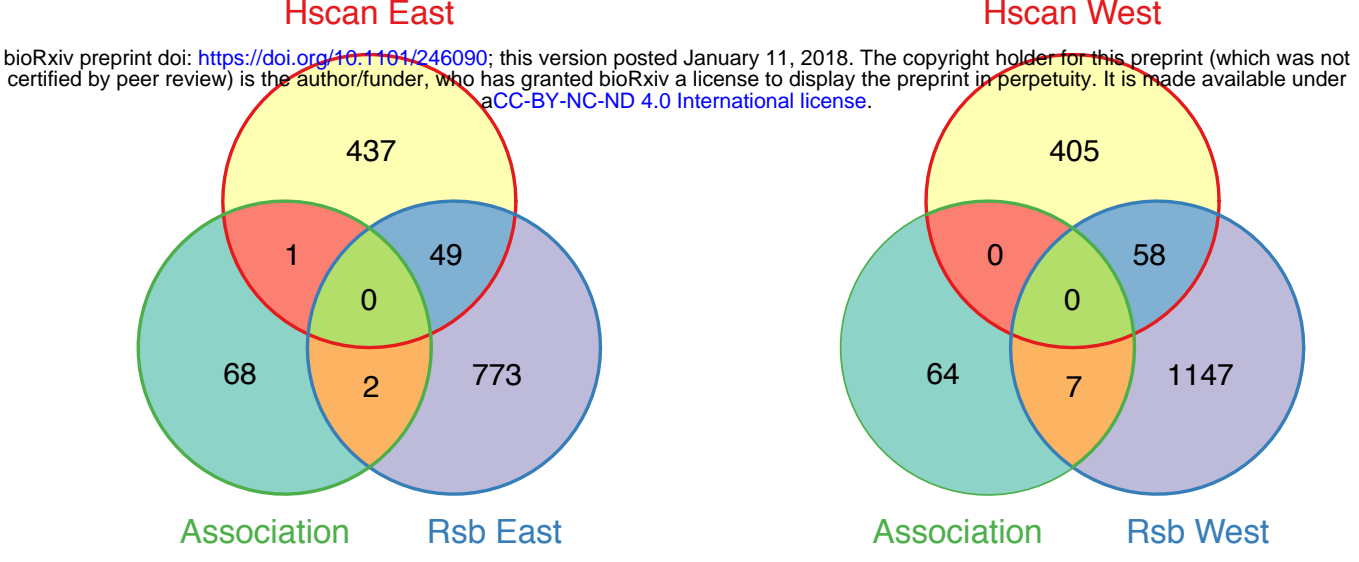**B**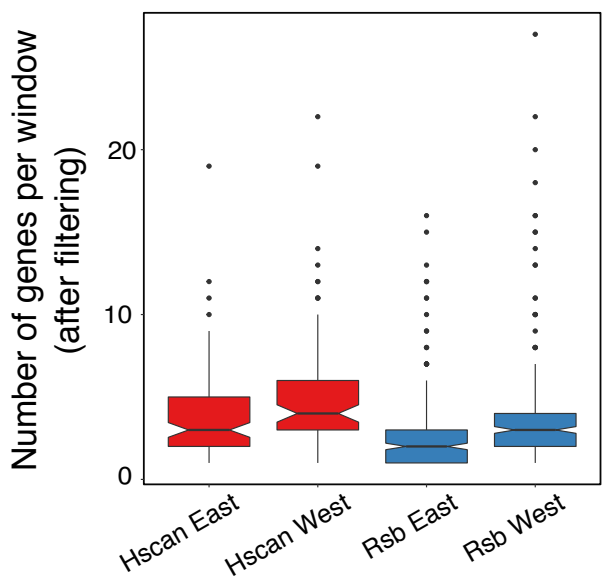**C**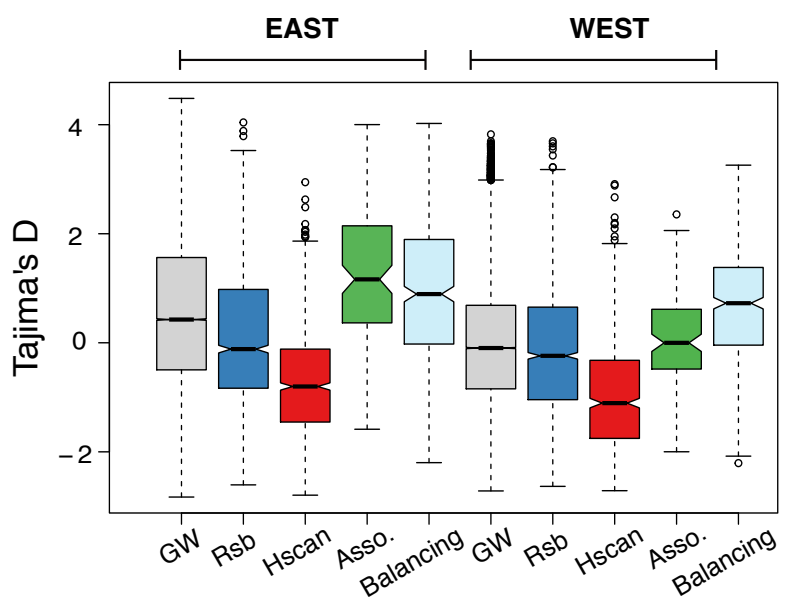**D**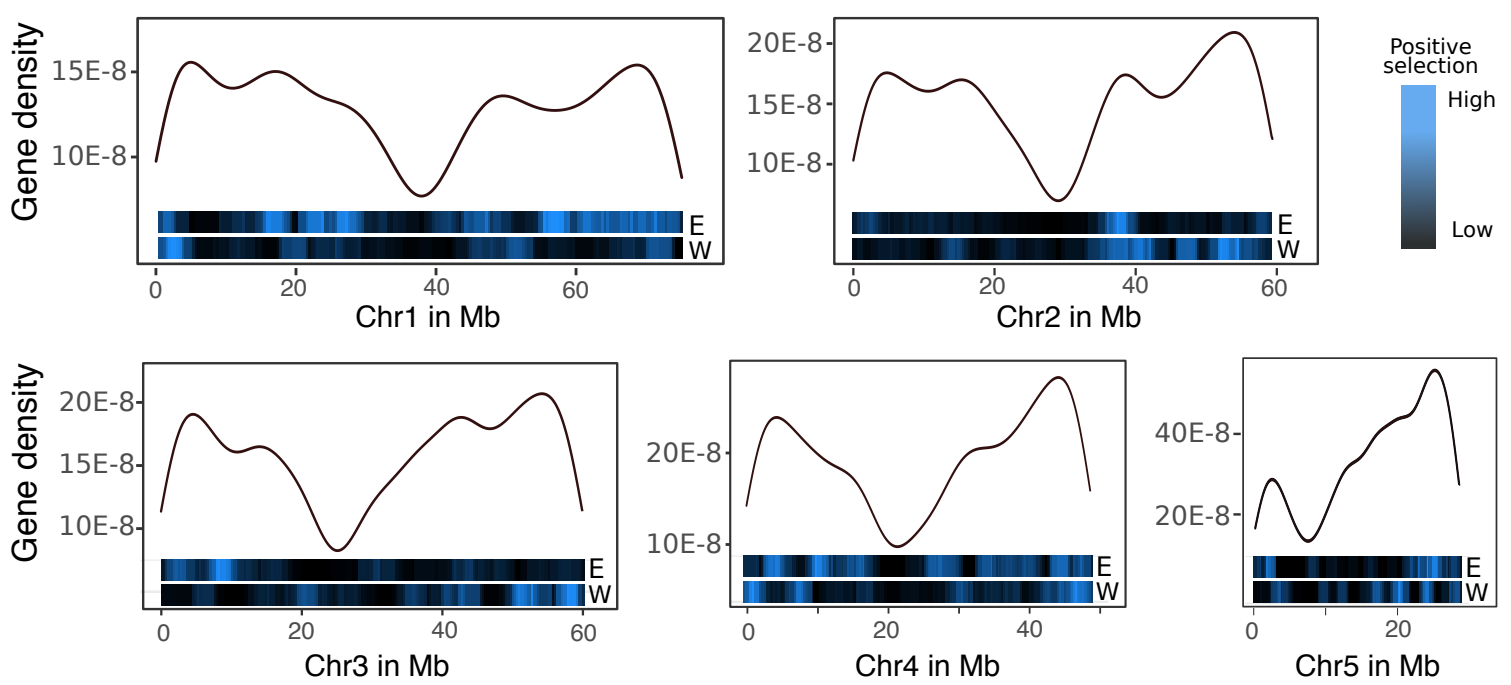

**Table 1: significant GO term associated to each test of selection**

| Test        | Significant GO process                                                                | Pvalue                           |
|-------------|---------------------------------------------------------------------------------------|----------------------------------|
| Association | None                                                                                  | NA                               |
| TMRCA       | Phosphorylation                                                                       | 3.13E-08                         |
| Rsb East    | Response to stress including:<br>- defense response<br>- response to oxidative stress | 3.00E-05<br>2.98E-03<br>2.98E-03 |
| RsbWest     | Nitrogen compound transport                                                           | 4.70E-03                         |
| H-scan East | Response to stress including:<br>- defense response<br>- response to cadmium ion      | 2.66E-04<br>7.82E-05<br>2.66E-04 |
| H-scan West | Pyruvate metabolic process                                                            | 4.00E-04                         |
